# Supplementary material
Source: MDPI journal article supplement (https://www.mdpi.com/2673-9976/20/1/16)
Supplement: s1 [file s1]

IECBM  
2022

# The 2nd International Electronic Conference on Biomolecules: BIOMACROMOLECULES AND THE MODERN WORLD CHALLENGES

01-15 NOVEMBER 2022 | ONLINE

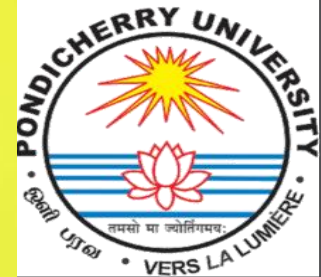

## Impact of different cross-linking agents on functional, rheological, and structural properties of talipot palm starch: A new source of stem starch

*Muhammed navaf<sup>1</sup>, Kappat Valiyapeediyekkal Sunooj<sup>1\*</sup>*

*Department of food science and technology, Pondicherry University, Puducherry, 605014  
India.*

Correspondence: [sunoojpufst786@gmail.com](mailto:sunoojpufst786@gmail.com)

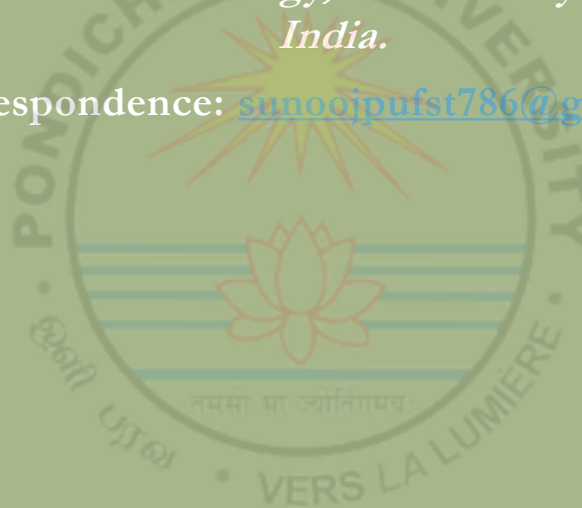

# INTRODUCTION

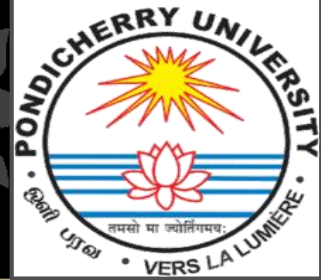

- Starch is naturally abundant botanical biomaterial found in the plant kingdom
- Talipot palm (*Corypha umbraculifera* L.) is a non-conventional source of starch with a starch yield of 76%.

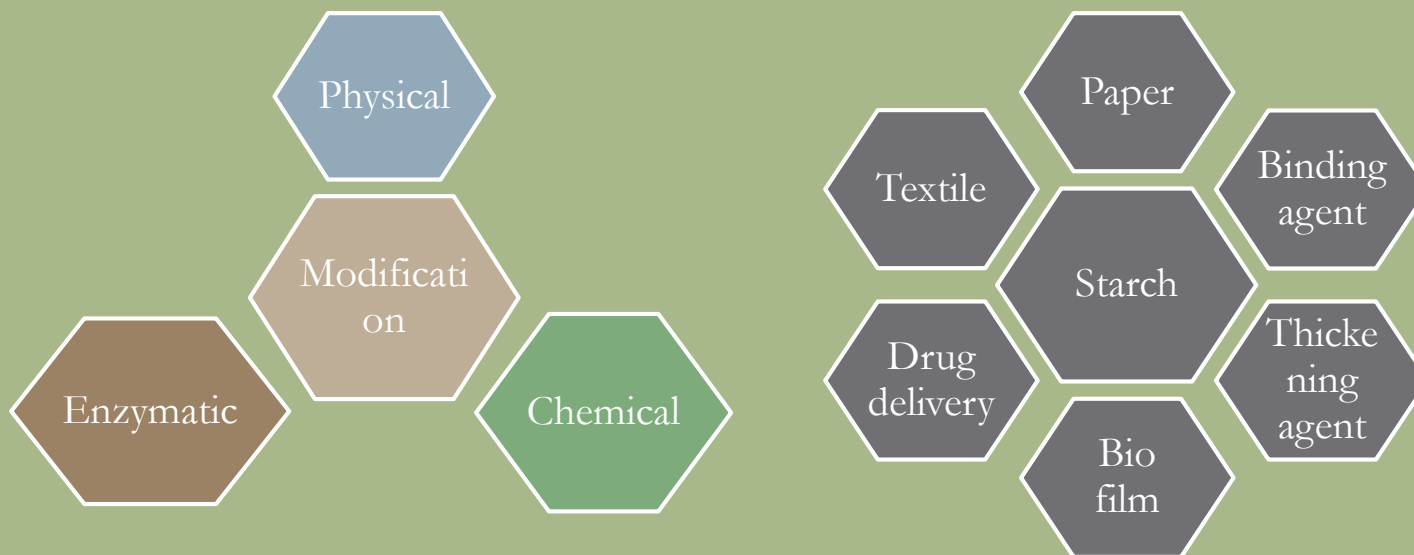

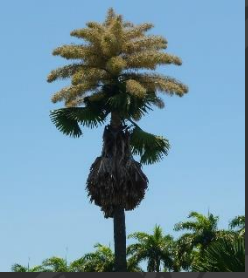

# OBJECTIVES

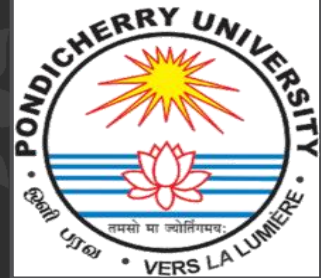

- To isolate the starch from the flour obtained from the trunk of Talipot palm.
- To modify starch by using epichlorohydrin and phosphoric acid.
- Characterization of modified starches

# PLAN OF WORK

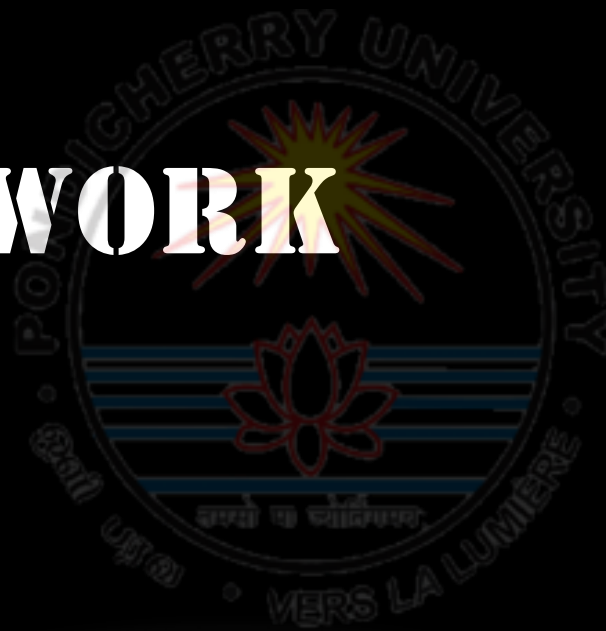

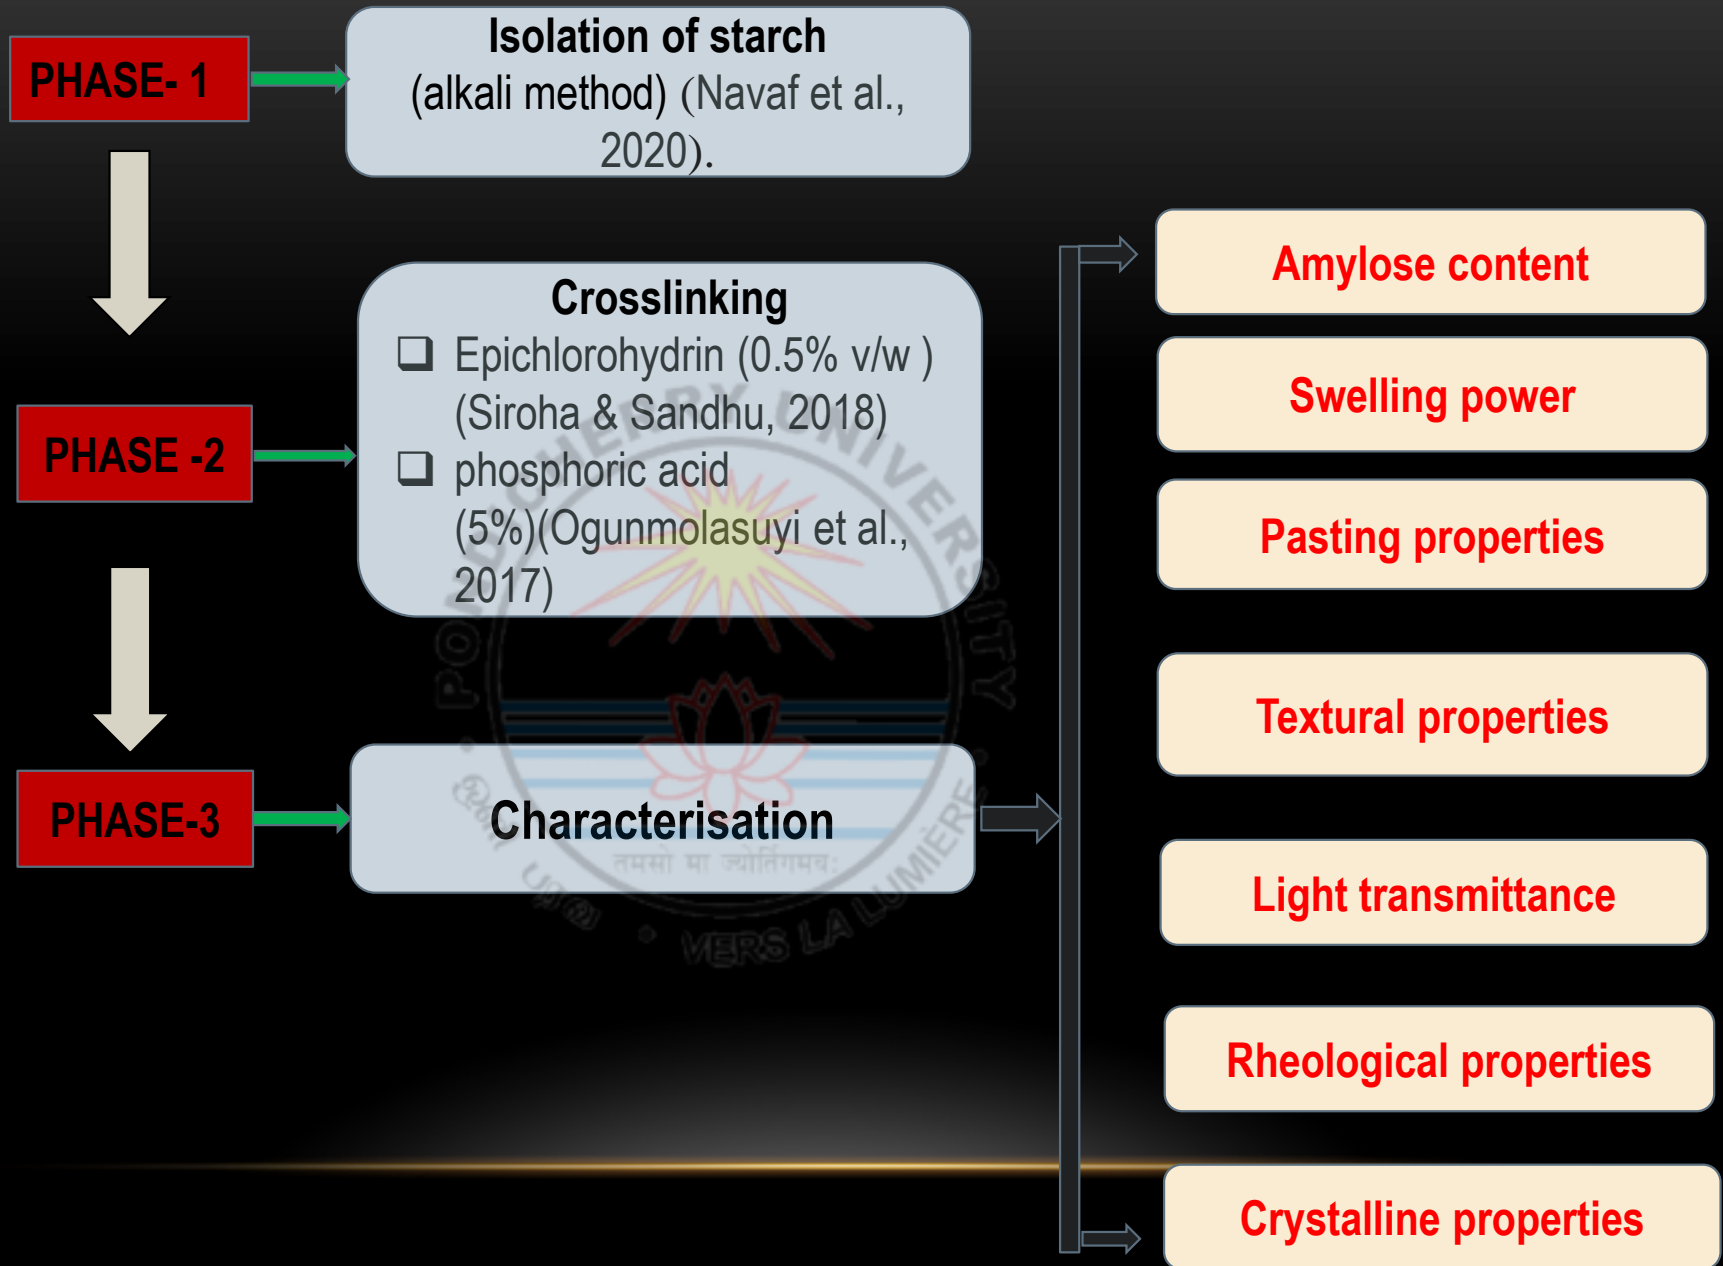

# RESULT & DISCUSSION

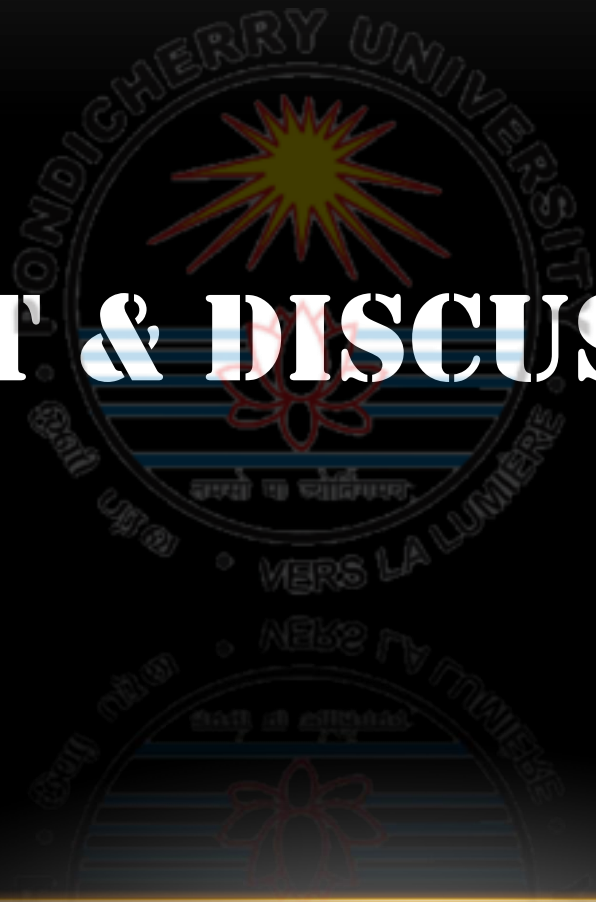

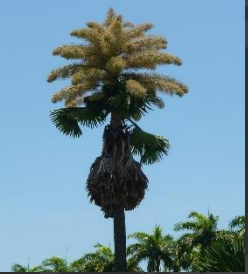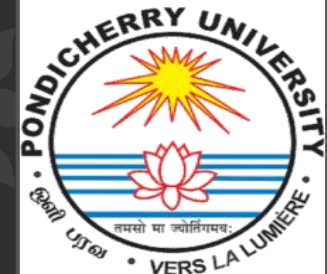

# AMYLOSE CONTENT AND SWELLING POWER

| Sample | Amylose (%)             |
|--------|-------------------------|
| CNS    | 26.13±0.71 <sup>a</sup> |
| EPS    | 19.15±0.34 <sup>c</sup> |
| PS     | 21.84±0.51 <sup>b</sup> |

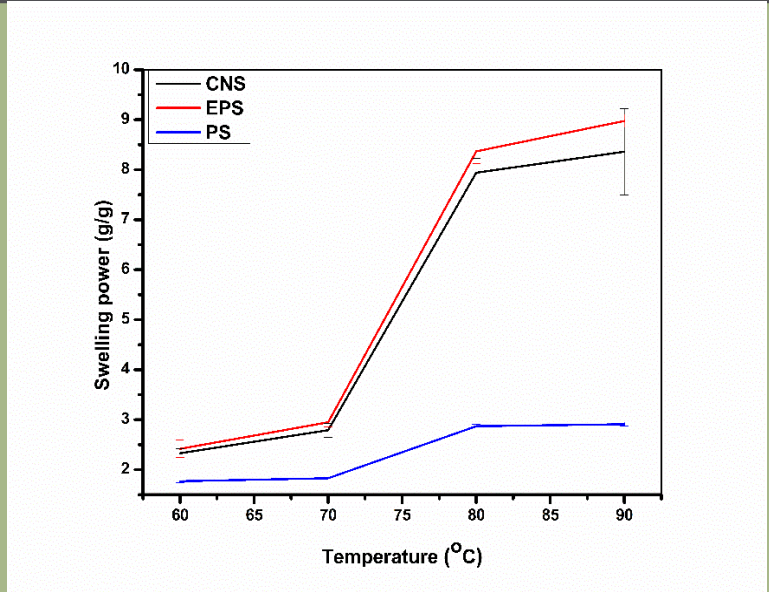

- The formation of ester linkages between starch chains in CLS's causes a decrease in the amylose content
- The increased SP of EPS was due to the low degree of cross-linking, which may retain granule integrity and increase the amount of water entrapped in granules.
- The decreased SP of PS is maybe due to the hydrolysis of glycosidic bonds during phosphoric acid treatment

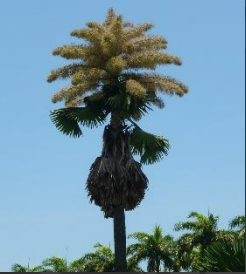

# PASTING PROFILE

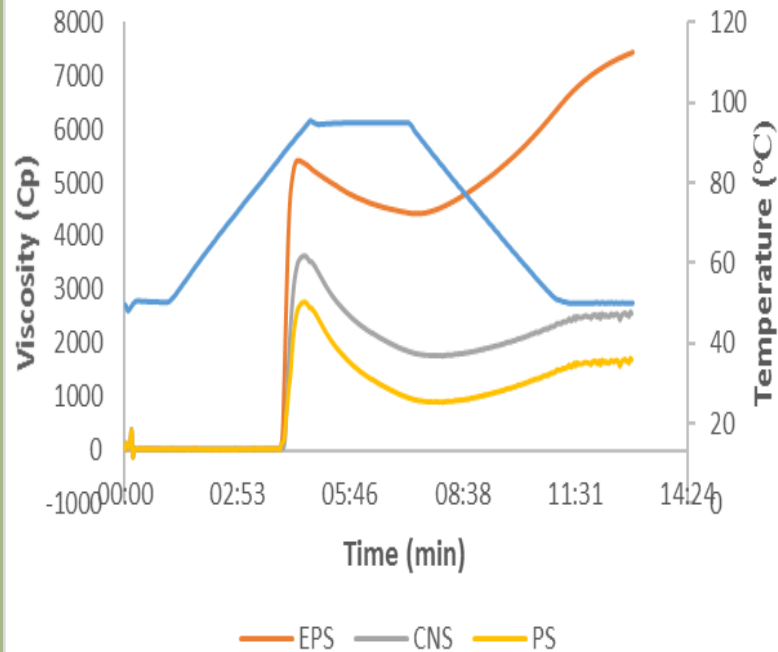

|        | CNS  | EPS  | PS   |
|--------|------|------|------|
| PV(cP) | 3646 | 5408 | 2773 |
| TV(cP) | 1765 | 4417 | 892  |
| BV(cP) | 1881 | 991  | 1881 |
| SV(cP) | 797  | 3019 | 797  |
| FV(cP) | 2562 | 7436 | 1689 |

- The increased pasting profile of EPS is due to the lower degree of cross-linking.
- The decreased peak viscosity of PS may be due to lower swelling power caused by the hydrolysis of glycosidic linkages.
- EPS exhibited a higher setback viscosity, and thus have a strong gel.
- cross-linking with the phosphate group restricted the re-orientation of amylose and amylopectin, leading to the decreased setback and final viscosities



## GEL TEXTURAL PROPERTIES

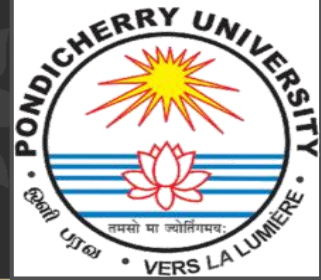

| Sample | Hardness (N)             | Springiness (mm)       | Gumminess (Nmm)         | Chewiness (Nmm)         | Cohesiveness           |
|--------|--------------------------|------------------------|-------------------------|-------------------------|------------------------|
| CNS    | 45.54±0.37 <sup>b</sup>  | 0.91±0.02 <sup>b</sup> | 23.36±0.33 <sup>b</sup> | 21.22±0.22 <sup>b</sup> | 0.52±0.01 <sup>a</sup> |
| EPS    | 149.69±1.34 <sup>a</sup> | 0.97±0.01 <sup>a</sup> | 66.75±0.63 <sup>a</sup> | 63.73±0.46 <sup>a</sup> | 0.43±0.00 <sup>b</sup> |
| PS     | 13.62±0.10 <sup>c</sup>  | 0.87±0.01 <sup>b</sup> | 5.59±0.48 <sup>c</sup>  | 5.18±0.27 <sup>c</sup>  | 0.43±0.01 <sup>b</sup> |

- The increased hardness of EPS may be due to the higher setback viscosity, resulting in higher re-orientation of starch molecules which form a strong gel.
- The lower gelation capacity and setback viscosity of PS limits the rate at which leached starch molecules reoriented, ending in the development of the weak gel during cold storage



# LIGHT TRANSMITTANCE

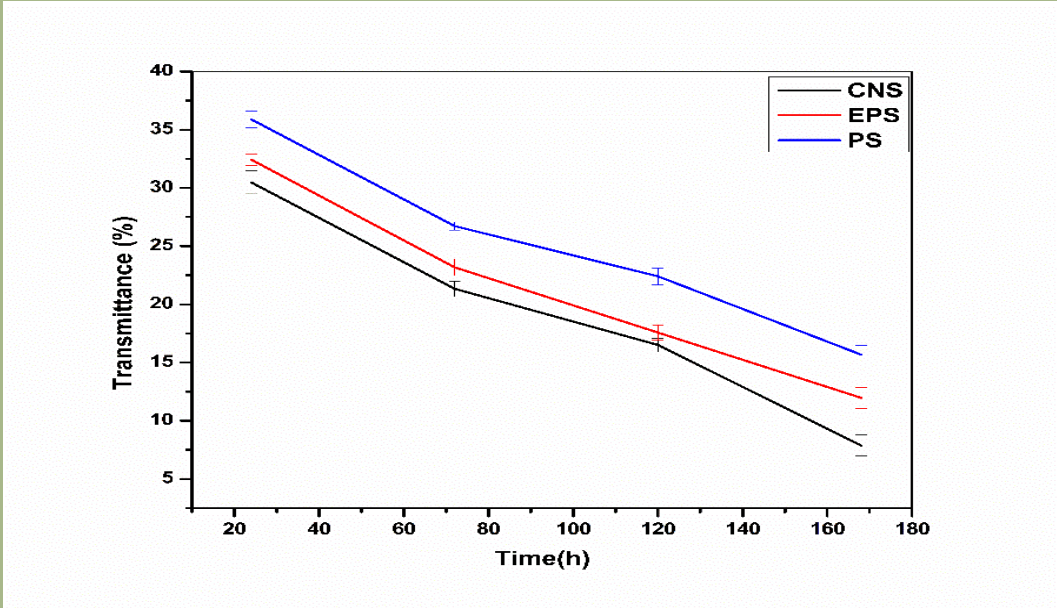

- The retrogradation rate, aggregate synthesis, and leaching of starch components, which causes turbidity to occur, are only a few of the variables that affect the light transmittance and paste clarity of starch gel during storage
- The increased light transmittance of EPS is due to high swelling power.
- The smaller, highly light-transparent molecules created by the hydrolysis of starch molecules may be the cause of improved light transmittance and paste clarity of PS

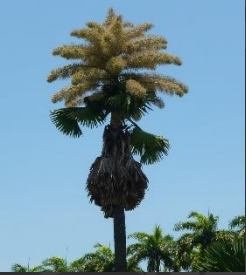

# RHEOLOGICAL PROPERTIES

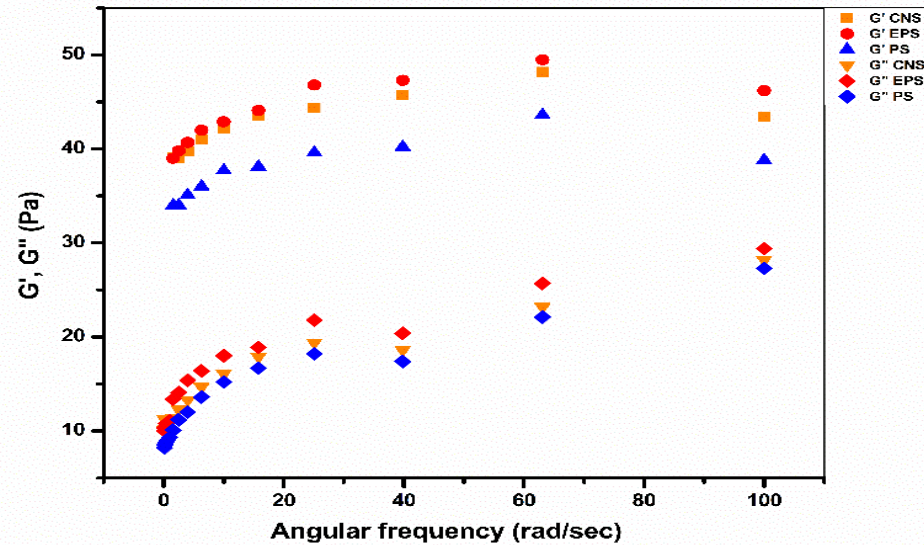

- The magnitude of  $G'$  and  $G''$  was significantly ( $p \leq 0.05$ ) changed by cross-linking
- The increased  $G'$  and  $G''$  values of EPS is maybe due to the formation of rigid gel with high molecular integrity
- The decreased  $G'$  and  $G''$  values of PS starch are due to the restricted rate of retrogradation, which leads to the development of a weak gel.



## STARCH CRYSTALLINITY

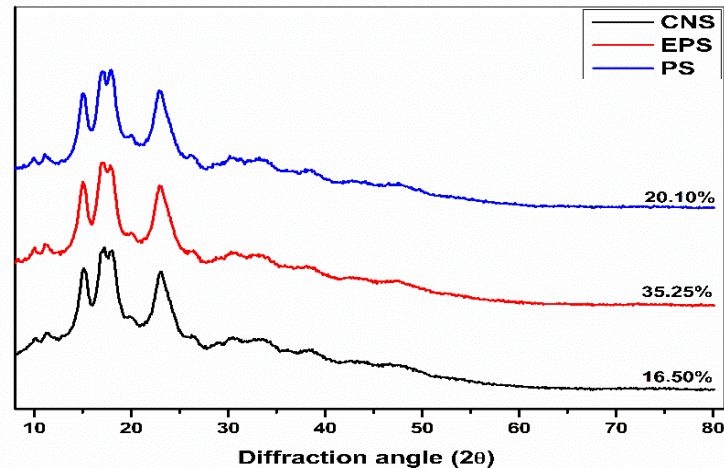

- All the diffractograms exhibited similar pattern characteristics of type A crystalline patterns with diffraction peaks at an angle of  $15.1^\circ$ ,  $17.2^\circ$ ,  $18.1^\circ$ , and  $23.2^\circ$ .
- The creation of a more ordered structure through cross-linking may be the cause of the enhanced RC value of EPS
- the increased RC value of PS could ascribe to the hydrolysis of the amorphous region and the formation of phosphate diester bond, giving increased integrity



## CONCLUSIONS



- Treatment of talipot starch with epichlorohydrin and phosphoric acid significantly changed the functional, pasting, textural, rheological, and structural properties.
- Treatment with epichlorohydrin improved the talipot starch's ability to swell and its pasting characteristics. However, it decreased in phosphoric acid-treated starch.
- Paste clarity of talipot starch was significantly improved in both EPS and PS
- Cross- linked talipot starches can be utilized for various food products like canned food, dairy products, etc.

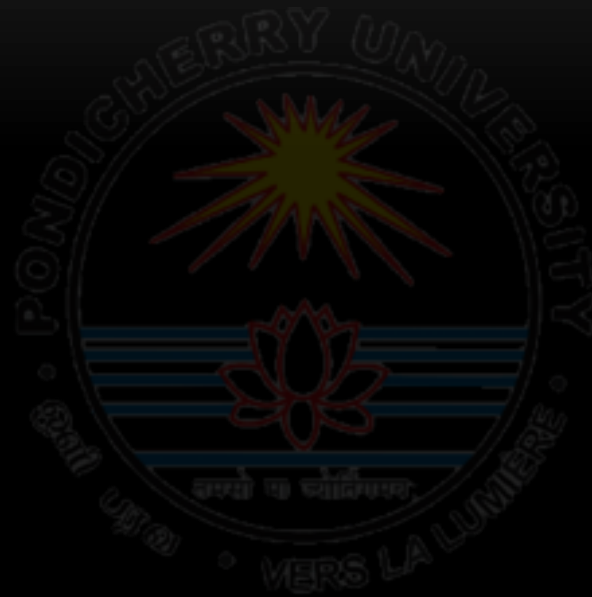

**Thank you....**

---
